# Supplementary material for: Design and synthesis of chromene-1,2,3-triazole benzene sulfonamide hybrids as potent carbonic anhydrase-IX inhibitors against prostate cancer
Source: Royal Society of Chemistry journal article supplement (doi:10.1039/d4md00302k), 2024-01-01
Supplement: d4md00302k1.pdf [file d4md00302k1.pdf]

**Design and Synthesis of Chromene-1,2,3-Triazole Benzene Sulfonamide  
Hybrids as potent Carbonic anhydrase-IX inhibitors against prostate cancer**

**Fawzia F. Albelwi,<sup>1</sup> Mohamed S. Nafie,<sup>2,3,\*</sup> Nader R. Albujuq,<sup>4,\*</sup> Wafa Hourani,<sup>5</sup>  
Ateyatallah Aljuhani,<sup>1</sup> Khaled M. Darwesh,<sup>6</sup> Mohamed M. Tawfik,<sup>7</sup> Nadjat Rezki,<sup>1,\*</sup>  
Mohamed Reda Aouad<sup>1</sup>**

**Supplementary data**

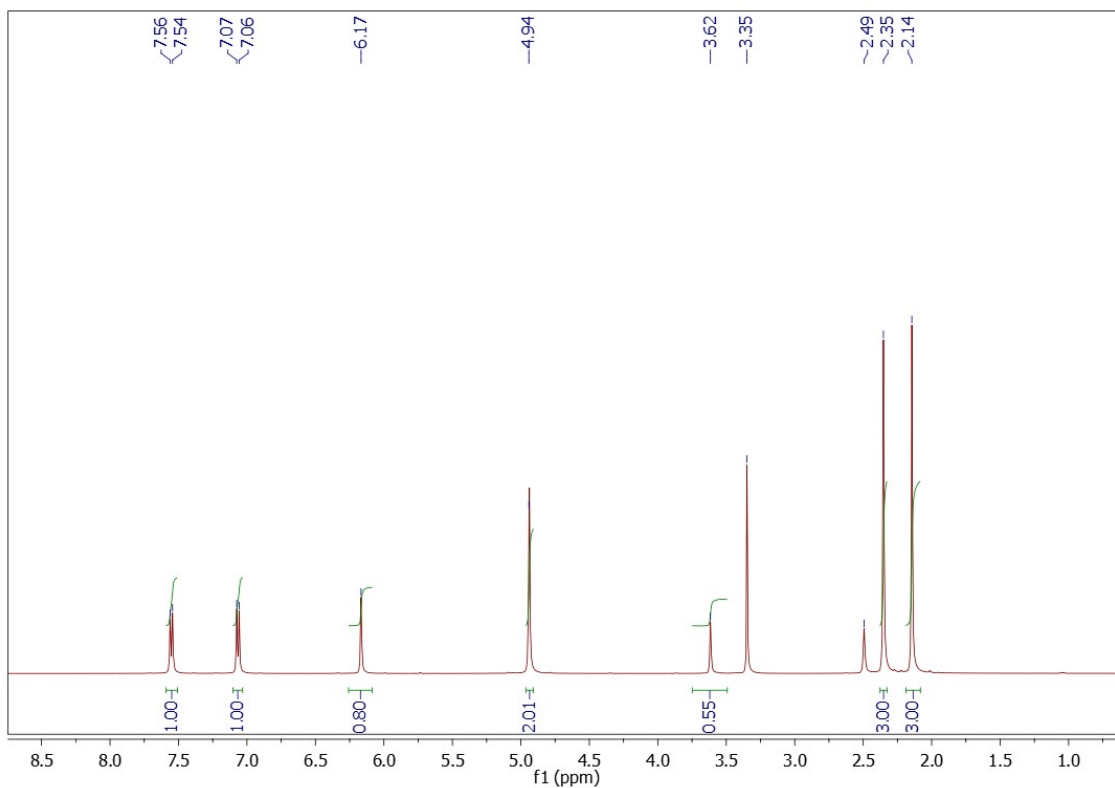

Figure S1:  $^1\text{H}$  NMR spectrum of compound 2a.

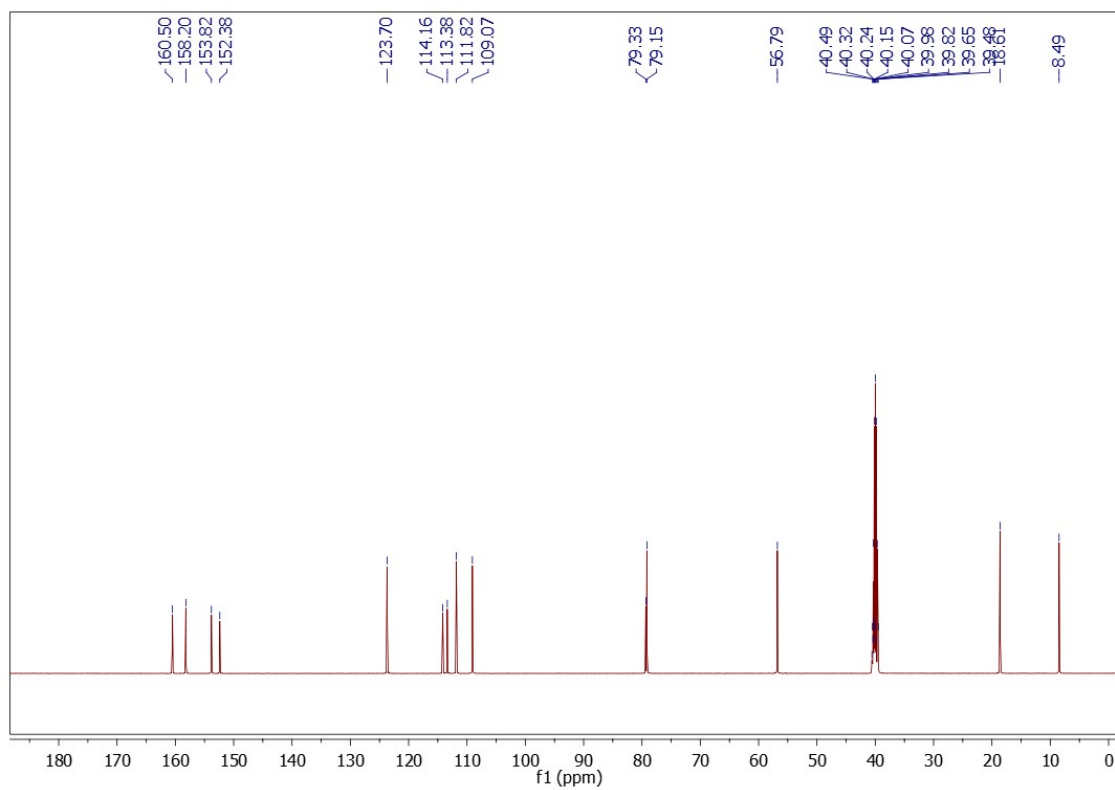

Figure S2:  $^{13}\text{C}$  NMR spectrum of compound 2a.

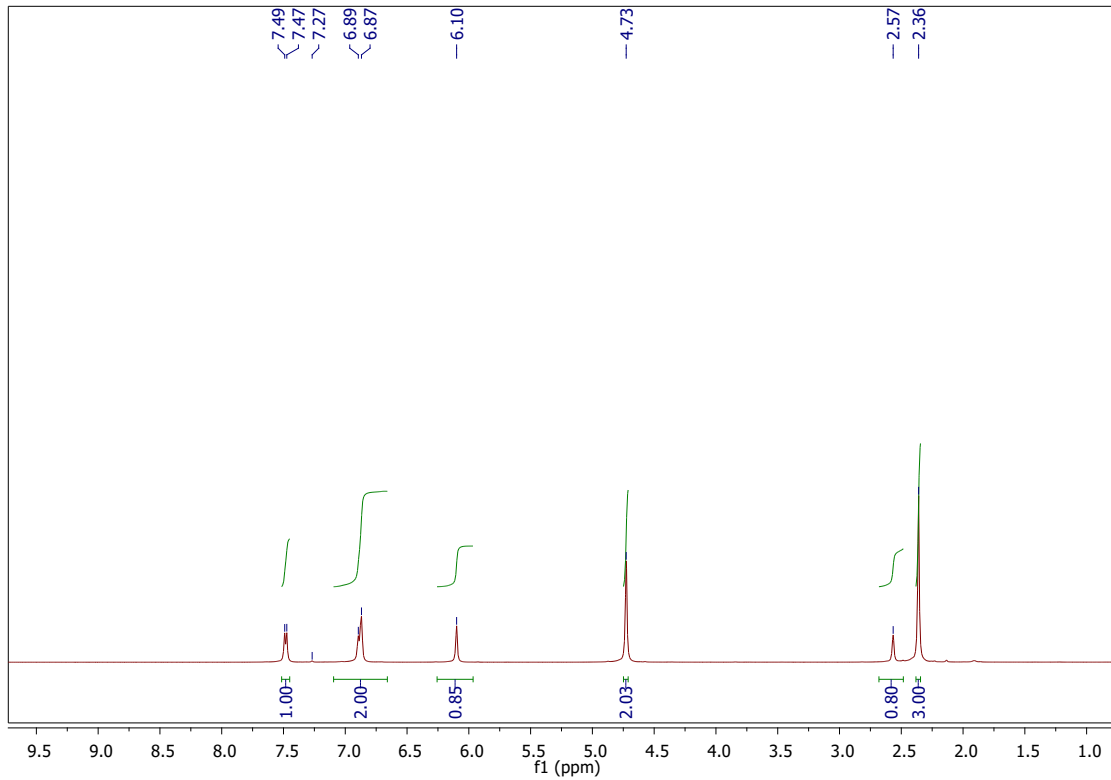

Figure S3:  $^1\text{H}$  NMR spectrum of compound **2b**.

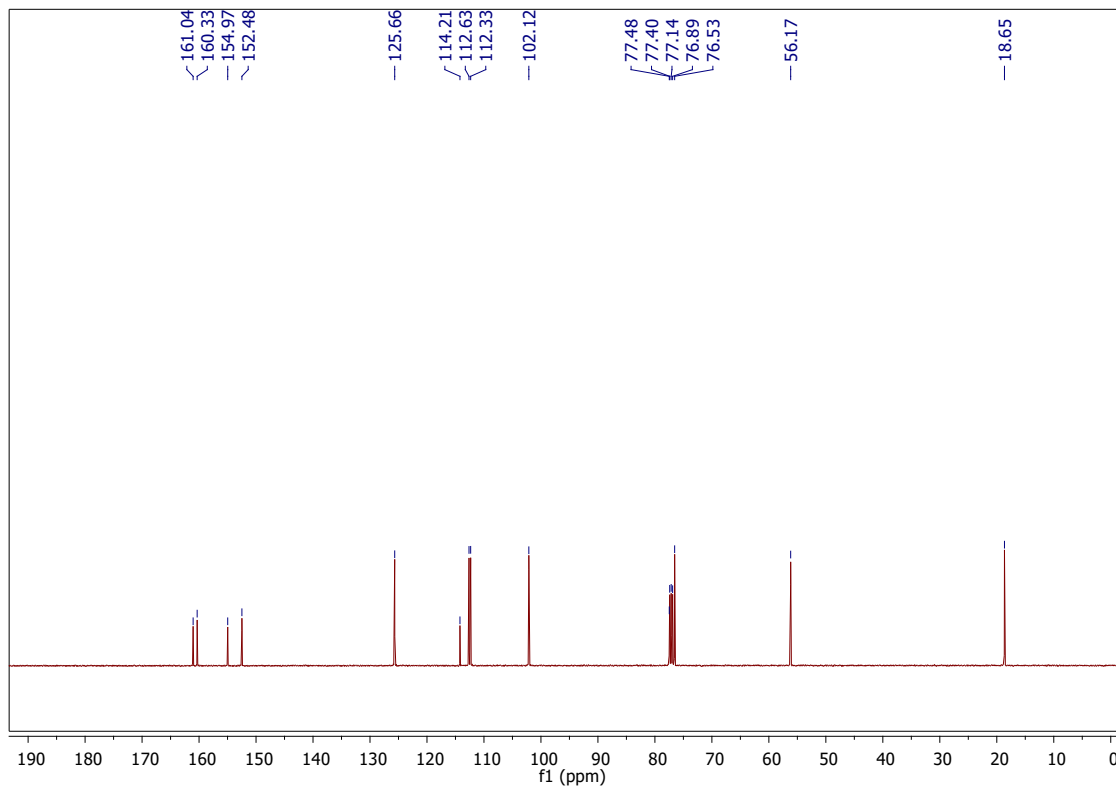

Figure S4:  $^{13}\text{C}$  NMR spectrum of compound **2b**.

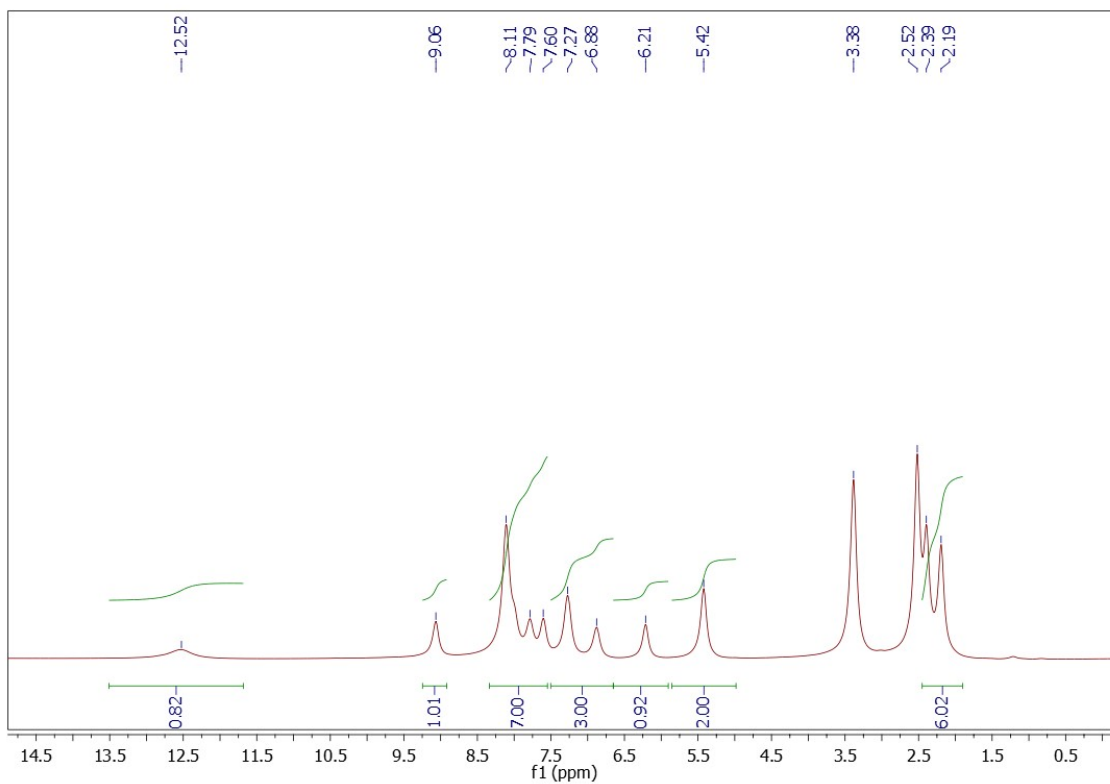

Figure S5:  $^1\text{H}$  NMR spectrum of compound 5a.

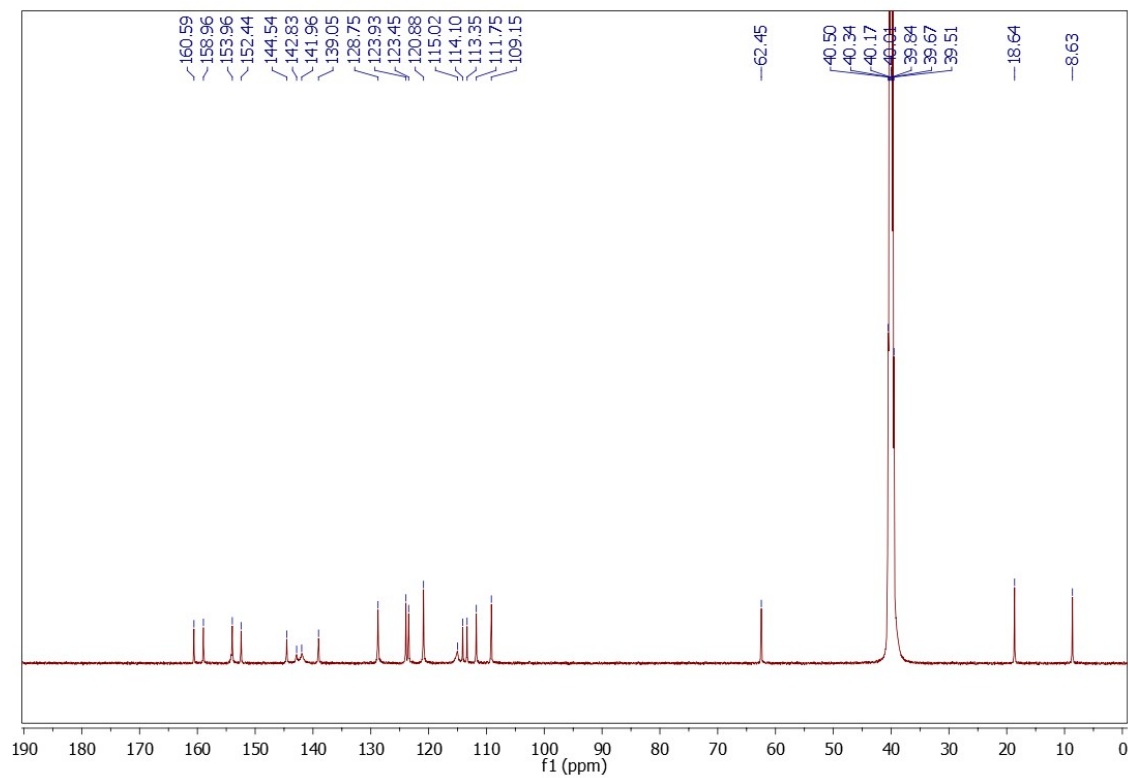

Figure S6:  $^{13}\text{C}$  NMR spectrum of compound 5a.

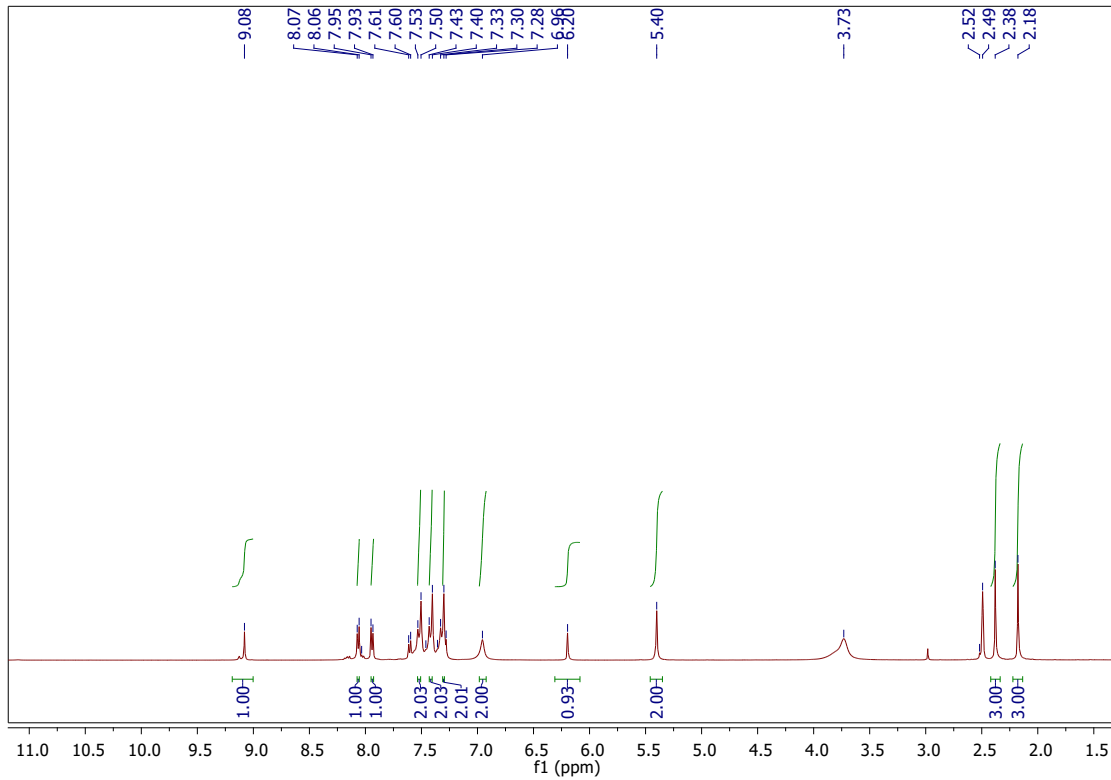

Figure S7:  $^1\text{H}$  NMR spectrum of compound 5d.

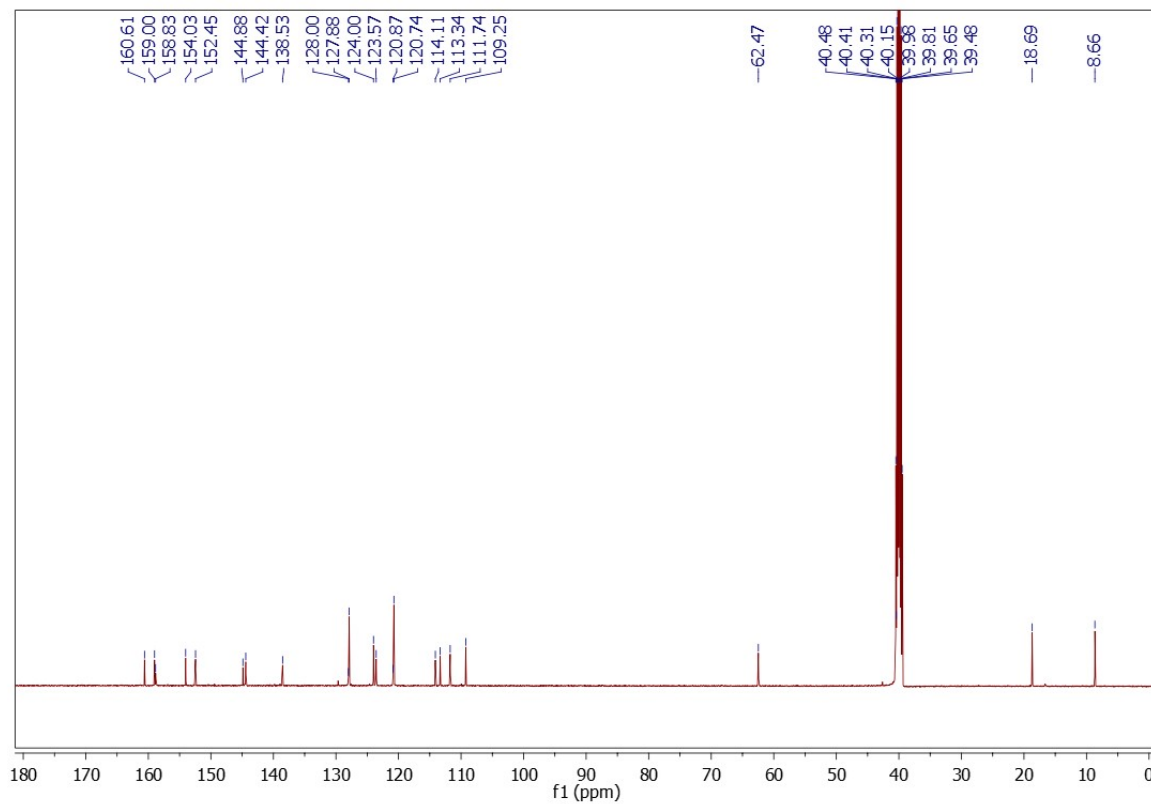

Figure S8:  $^{13}\text{C}$  NMR spectrum of compound 5d.

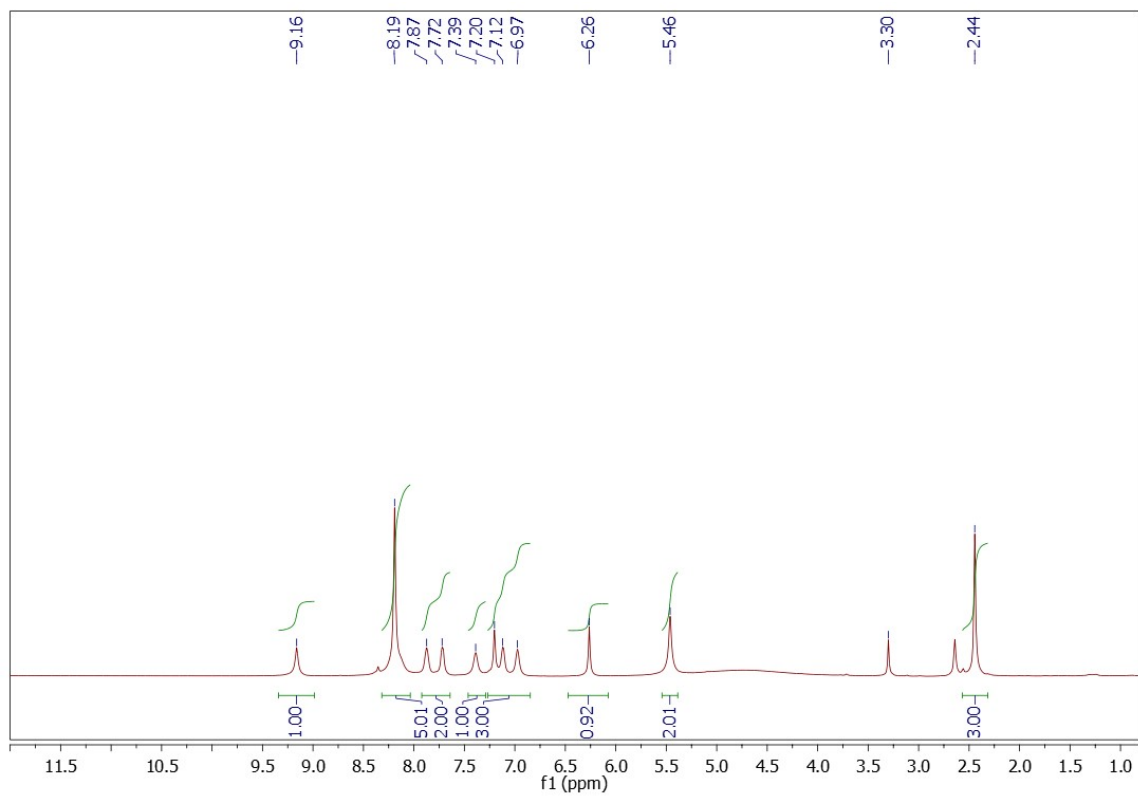

**Figure S9:**  $^1\text{H}$  NMR spectrum of compound **5e**.

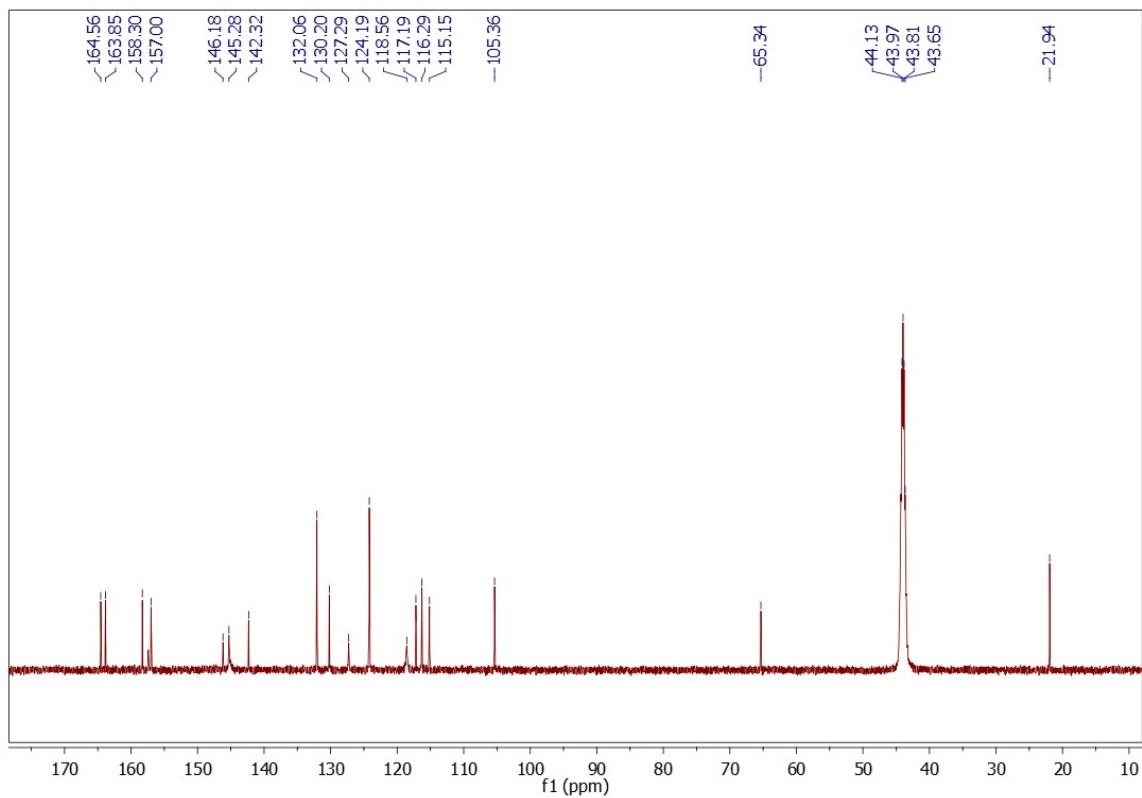

**Figure S10:**  $^{13}\text{C}$  NMR spectrum of compound **5e**.

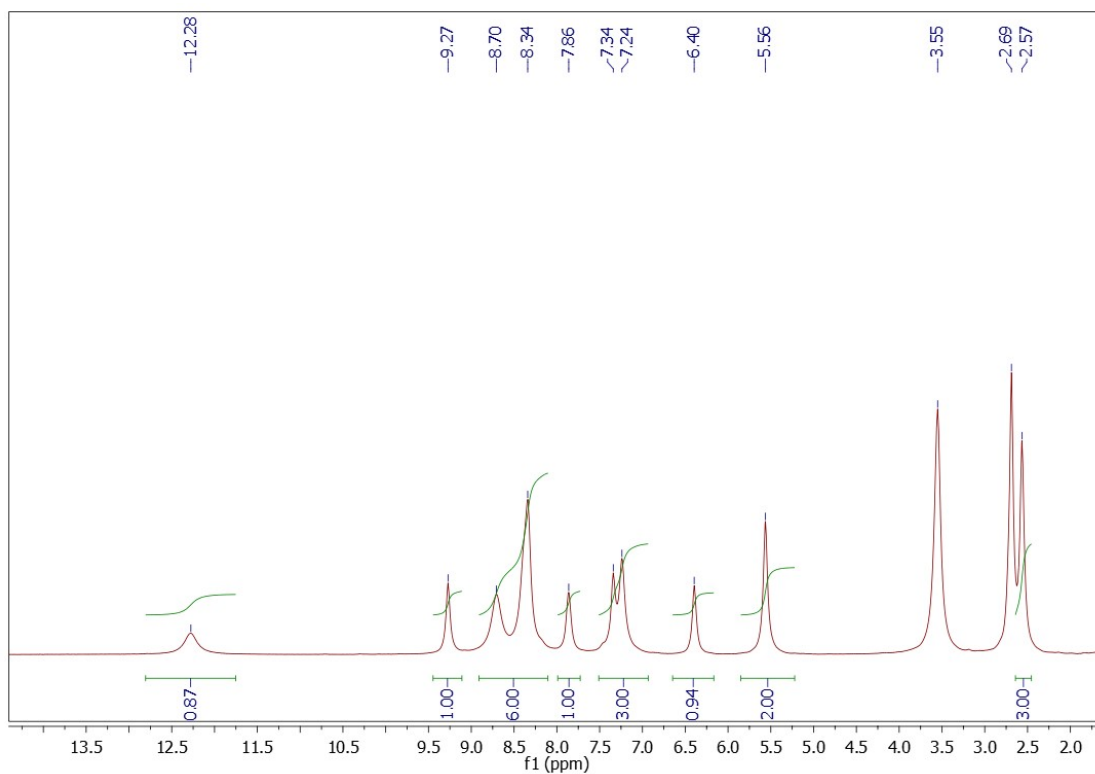

Figure S11:  $^1\text{H}$  NMR spectrum of compound 5f.

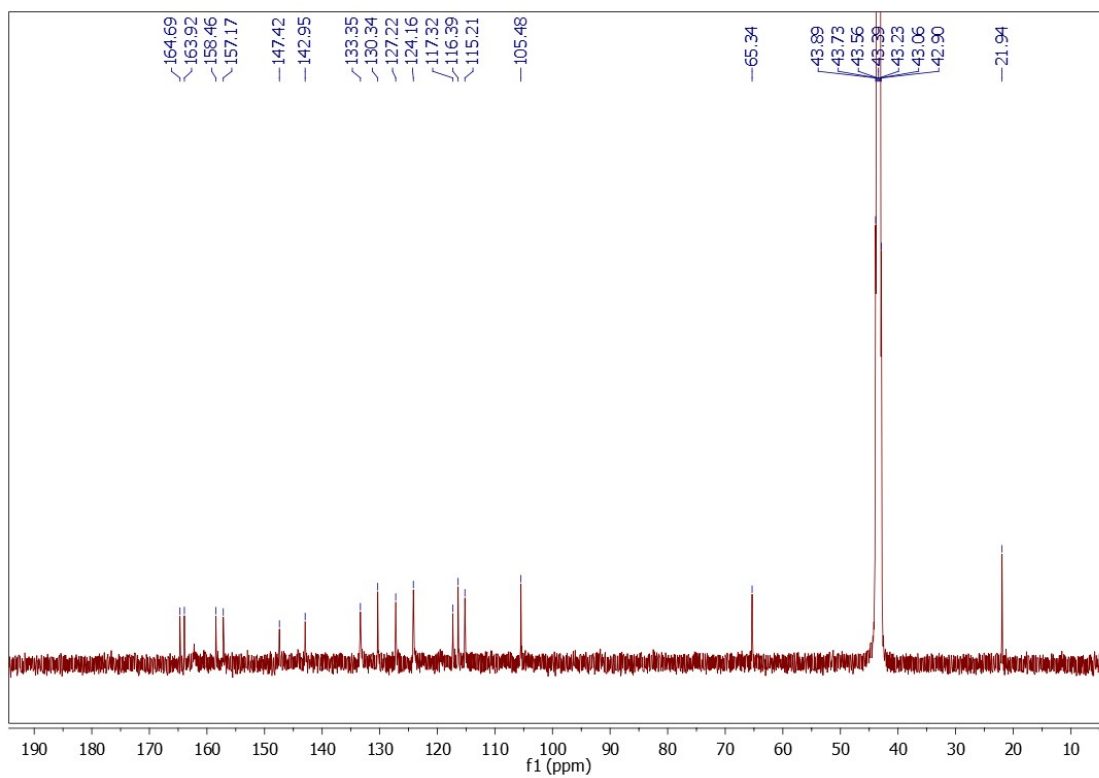

Figure S12:  $^{13}\text{C}$  NMR spectrum of compound 5f.

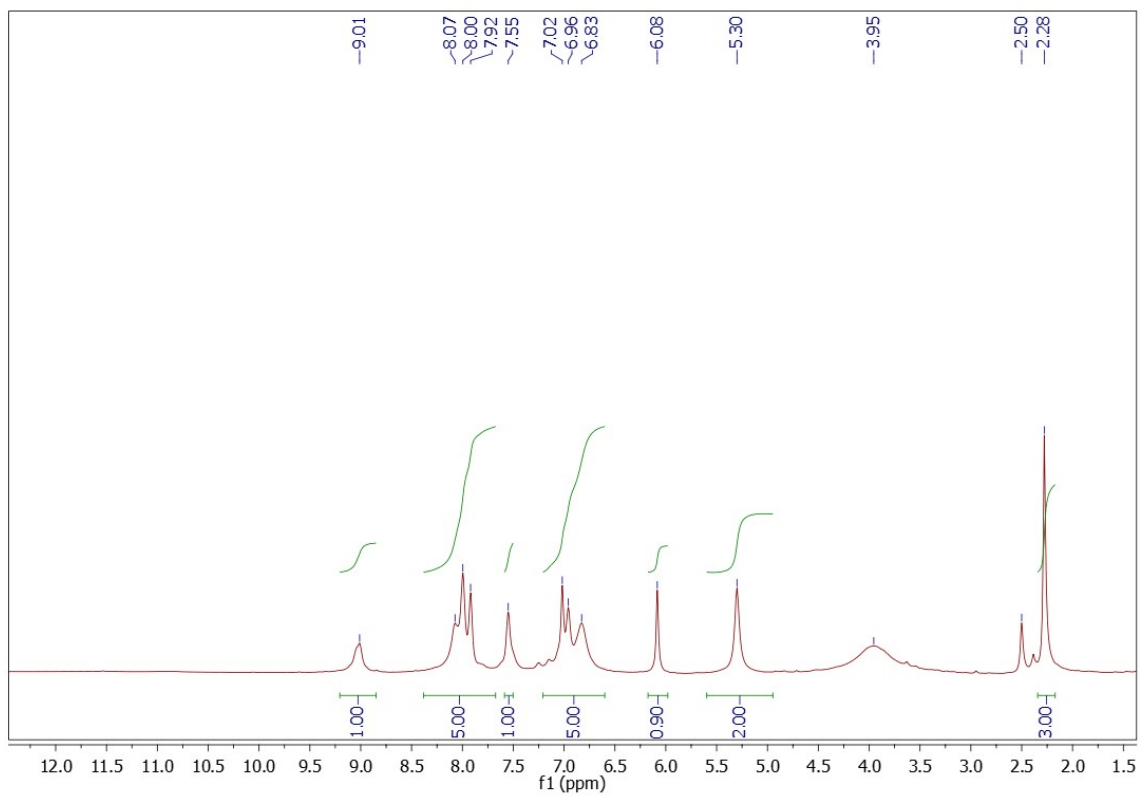

**Figure S13:**  $^1\text{H}$  NMR spectrum of compound **5h**.

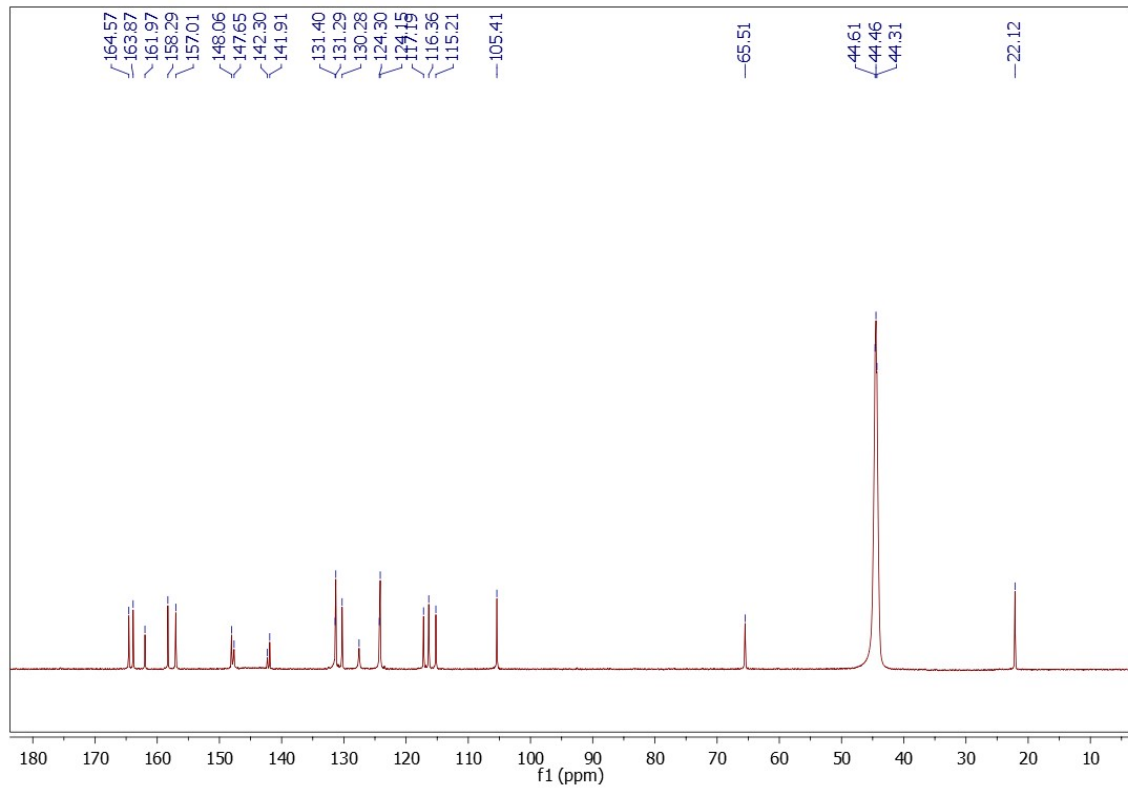

**Figure S14:**  $^{13}\text{C}$  NMR spectrum of compound **5h**.



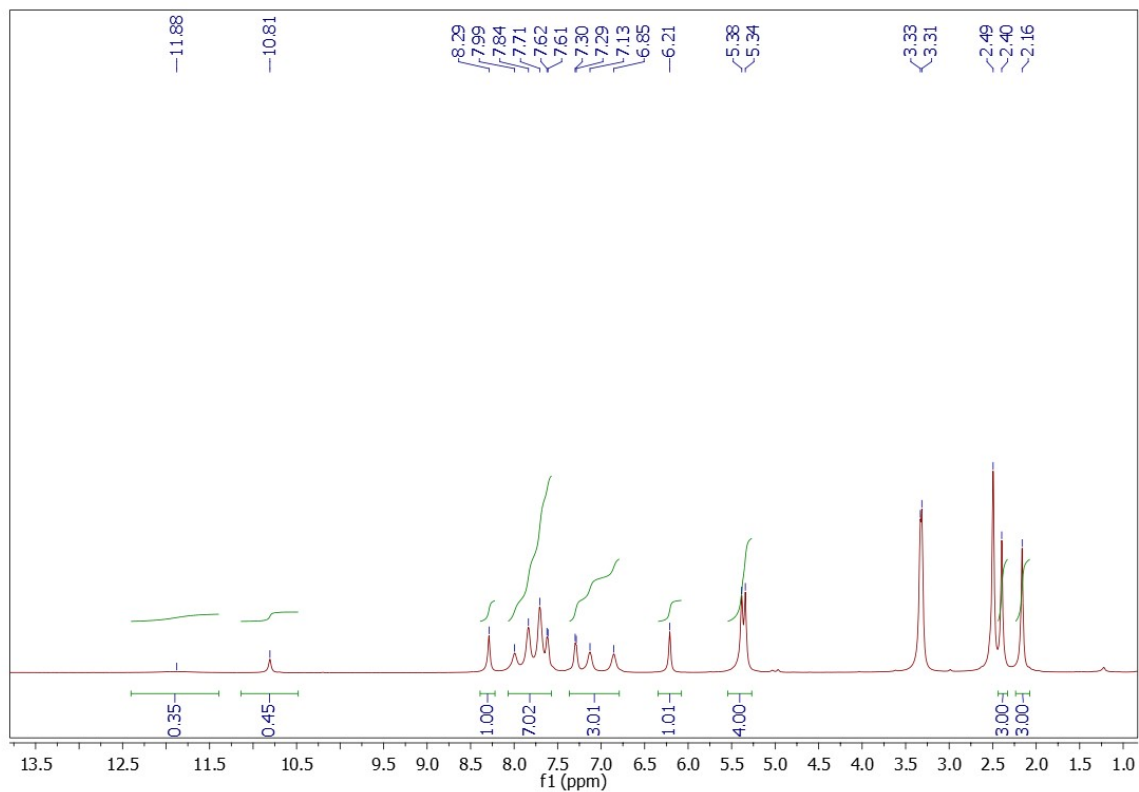

Figure S15:  $^1\text{H}$  NMR spectrum of compound 7a.

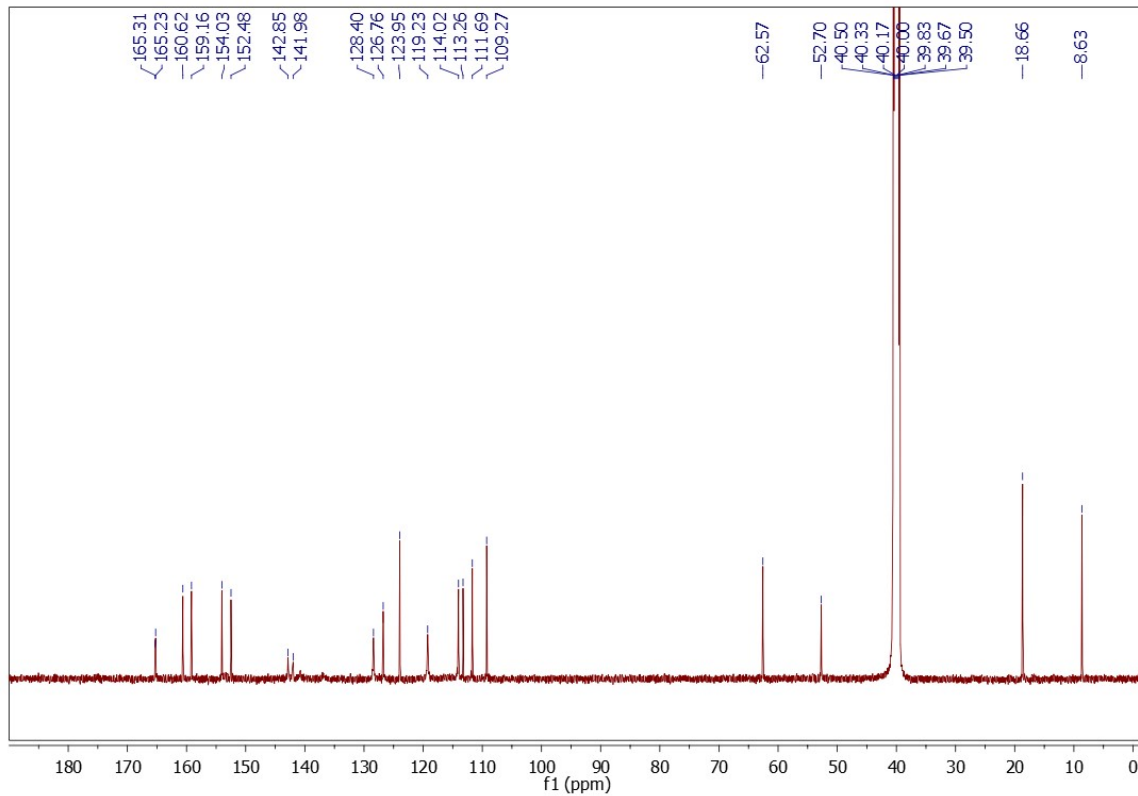

Figure S16:  $^{13}\text{C}$  NMR spectrum of compound 7a.

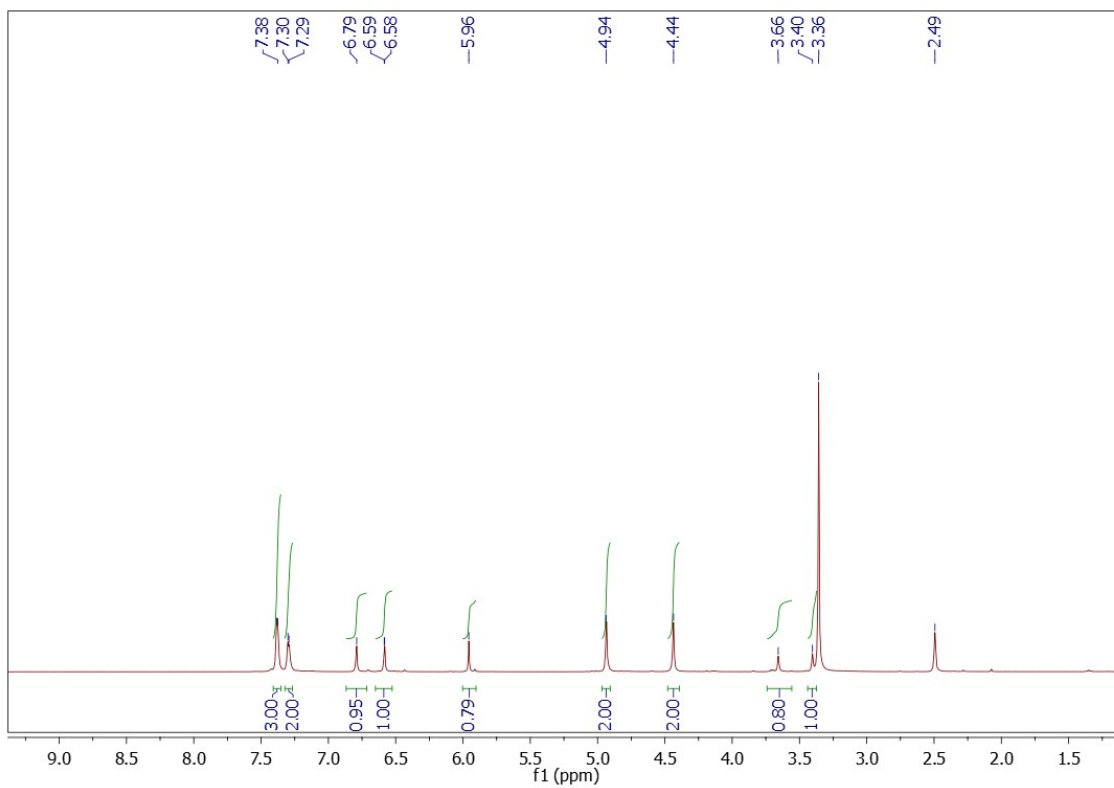

Figure S17:  $^1\text{H}$  NMR spectrum of compound 9.

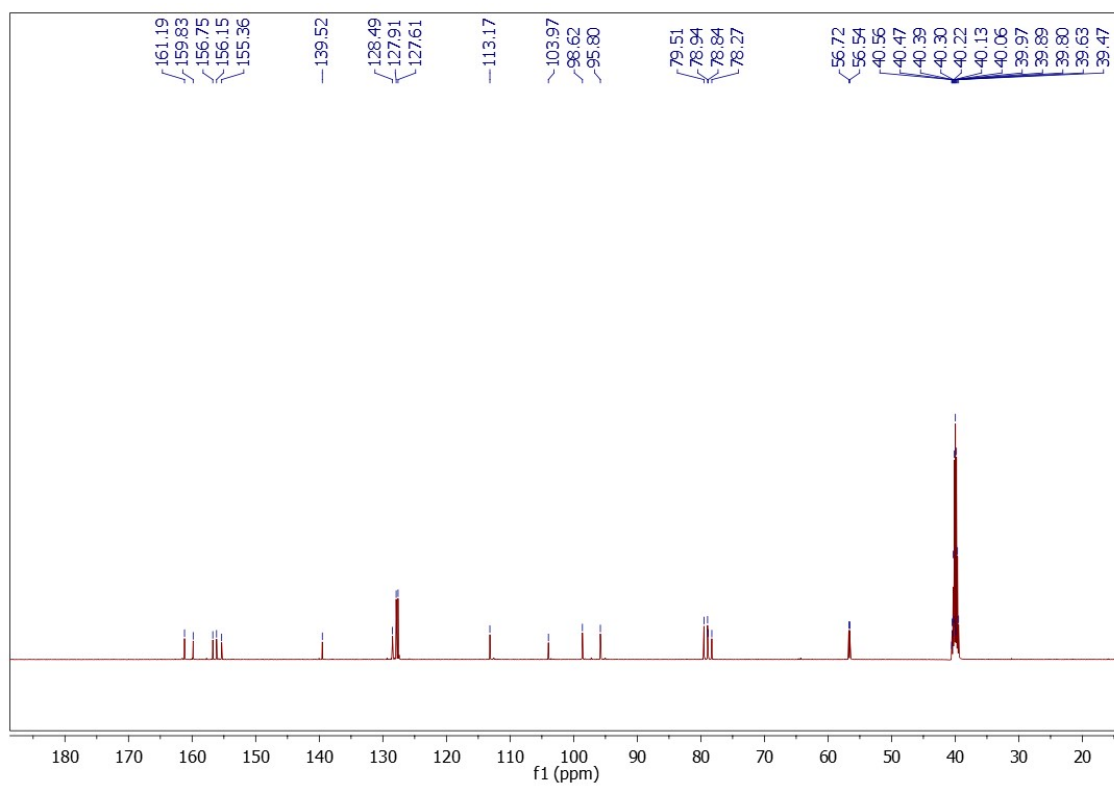

Figure S18:  $^{13}\text{C}$  NMR spectrum of compound 9.

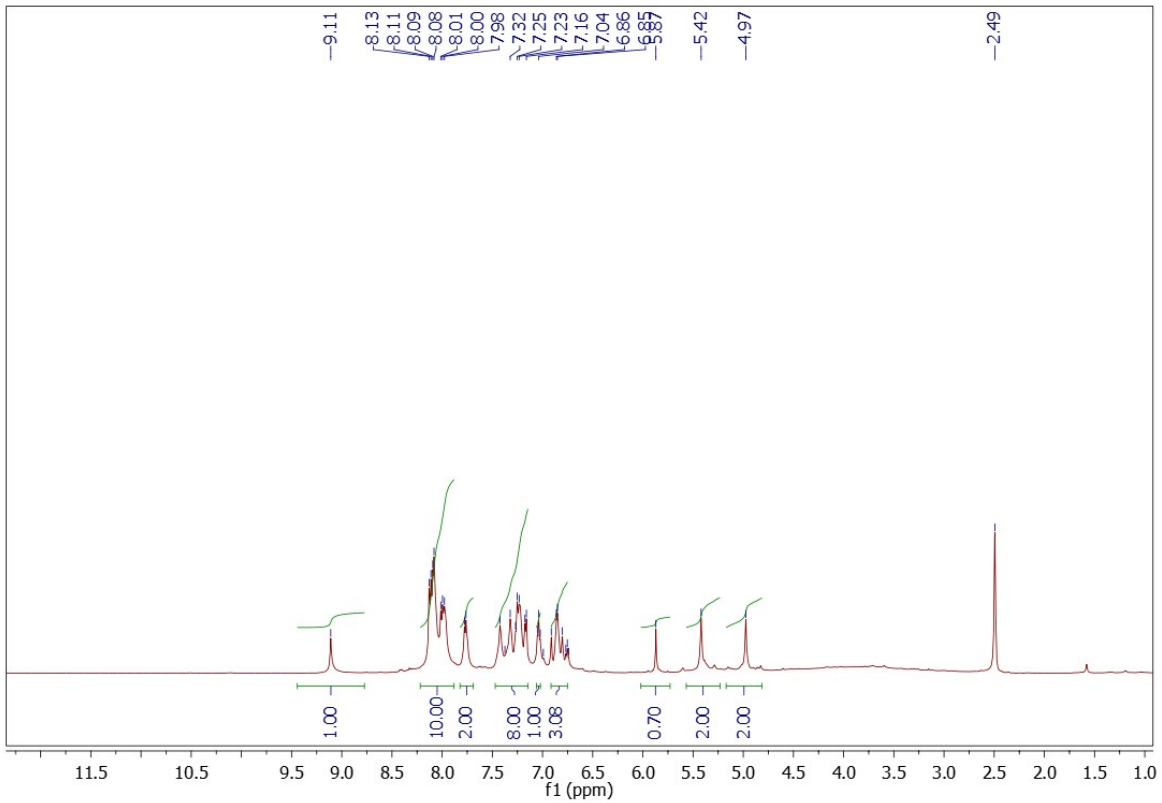

Figure S19:  $^1\text{H}$  NMR spectrum of compound 10a.

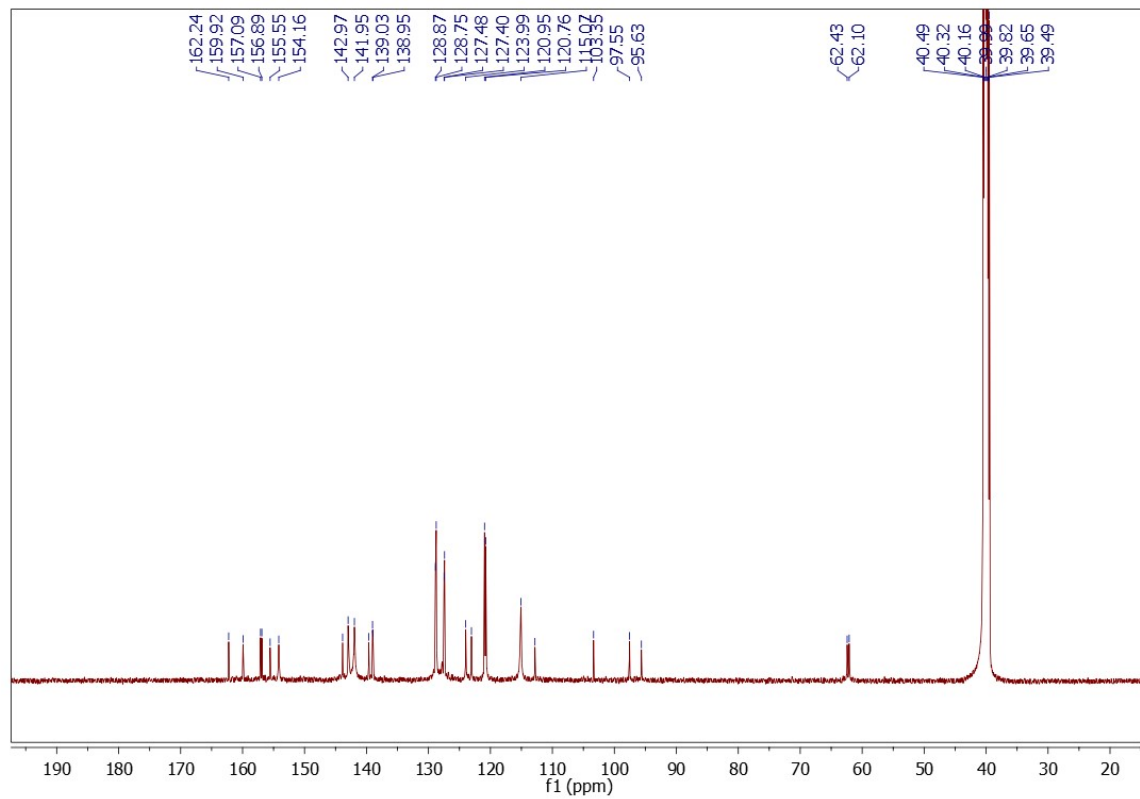

Figure S20:  $^{13}\text{C}$  NMR spectrum of compound 10a.

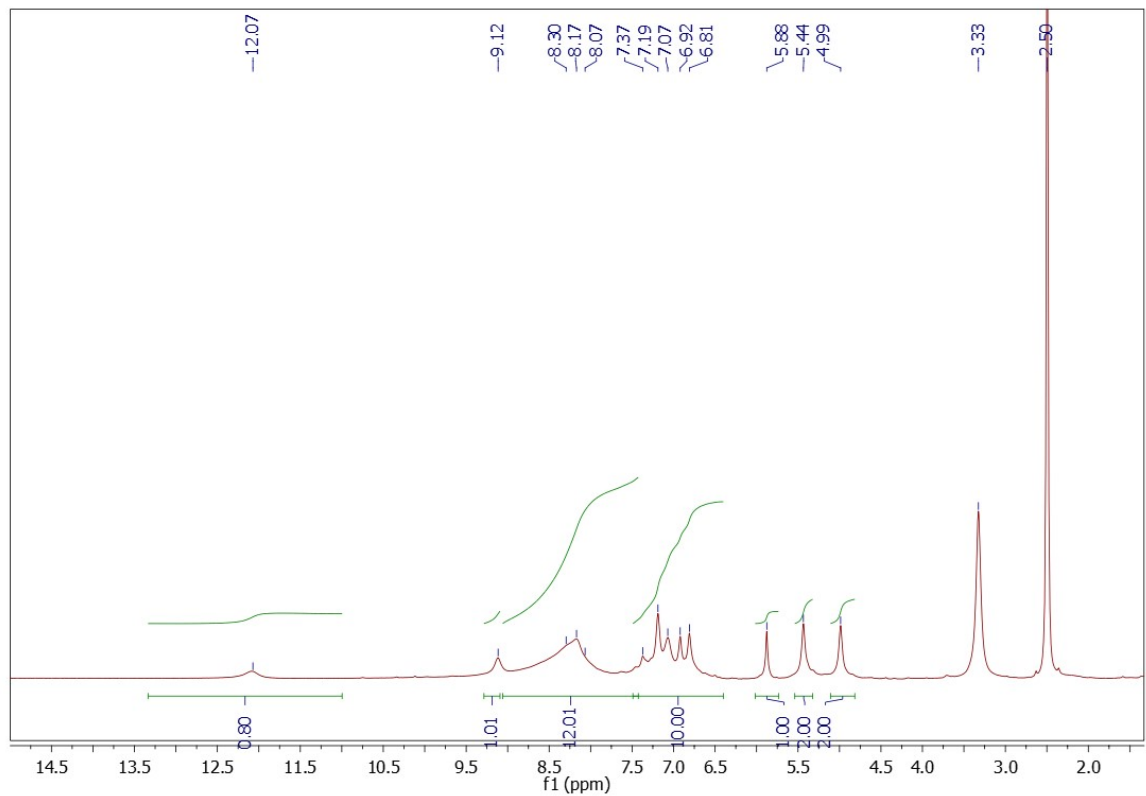

Figure S21:  $^1\text{H}$  NMR spectrum of compound **10b**.

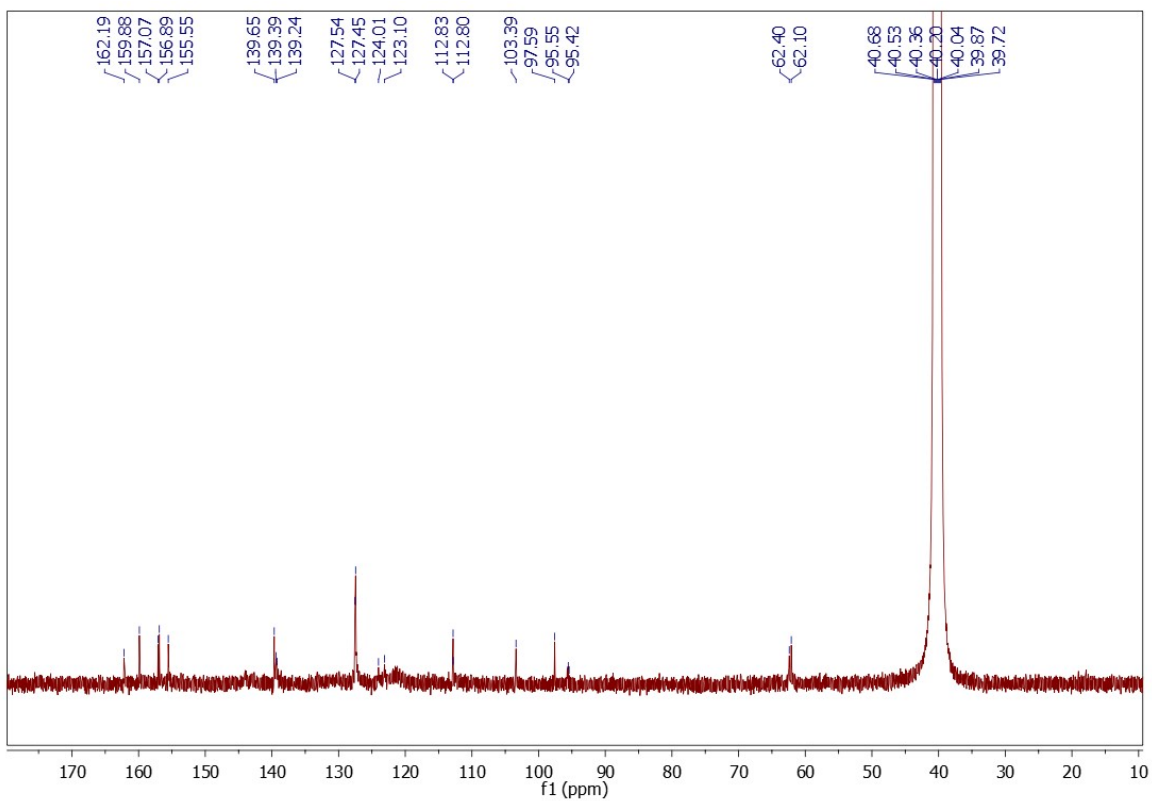

Figure S22:  $^{13}\text{C}$  NMR spectrum of compound **10b**.
